# Supplementary material for: Physiological outcomes of calming behaviors support the resilience hypothesis in horses
Source: PubMed Central journal article supplement (PMC6269543; doi:10.1038/s41598-018-35561-7), 2018-11-30
Supplement: 41598_2018_35561_MOESM1_ESM.pdf [file 41598_2018_35561_MOESM1_ESM.pdf]

## Physiological outcomes of calming behaviors support the resilience hypothesis in horses

Chiara Scopa<sup>1</sup>, Elisabetta Palagi<sup>2</sup>, Claudio Sighieri<sup>3</sup>, Paolo Baragli<sup>3\*</sup>

1 Italian National Reference Centre for Animal Assisted Interventions, Istituto Zooprofilattico Sperimentale delle Venezie, Legnaro (Padua), Italy

2 Natural History Museum University of Pisa Calci Italy

3 Department of Veterinary Sciences, University of Pisa, Italy

Supplementary Table S1

| Horse    | Age | Sex |
|----------|-----|-----|
| banwieu  | 16  | G   |
| beauty   | 24  | F   |
| calipso  | 22  | G   |
| coral    | 12  | G   |
| degas    | 14  | G   |
| dianca   | 22  | F   |
| doris    | 18  | G   |
| espana   | 9   | F   |
| fomelia  | 22  | F   |
| gitan    | 12  | G   |
| jim      | 24  | G   |
| kalief   | 11  | G   |
| magic    | 15  | G   |
| mauritz  | 14  | G   |
| mazad    | 14  | G   |
| mnoris   | 8   | G   |
| mr blue  | 18  | G   |
| mustafà  | 12  | G   |
| naftan   | 11  | G   |
| nepal    | 10  | G   |
| noelle   | 6   | F   |
| pampero  | 15  | G   |
| parsifal | 8   | G   |
| piorum   | 16  | G   |
| pippo    | 6   | G   |
| remulus  | 11  | G   |
| rocky    | 24  | G   |
| roi      | 15  | G   |
| ruchel   | 11  | G   |
| stallone | 10  | G   |
| sultan   | 24  | G   |
| vadoc    | 18  | G   |
| zefir    | 10  | G   |

List of the animals included in the analyses (F = female; G = gelding).
